# Supplementary material for: Transcriptome Remodeling of Differentiated Cells during Chronological Ageing of Yeast Colonies: New Insights into Metabolic Differentiation
Source: Hindawi journal article supplement (doi:10.1155/2018/4932905), 2018-01-01
Supplement: f1 [file 4932905.f1.pdf]

A

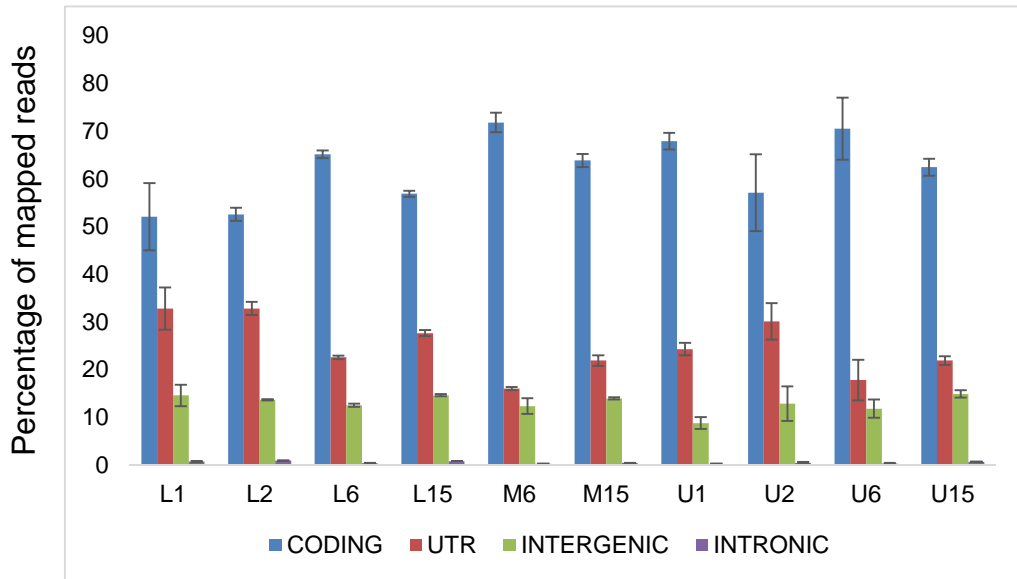

B

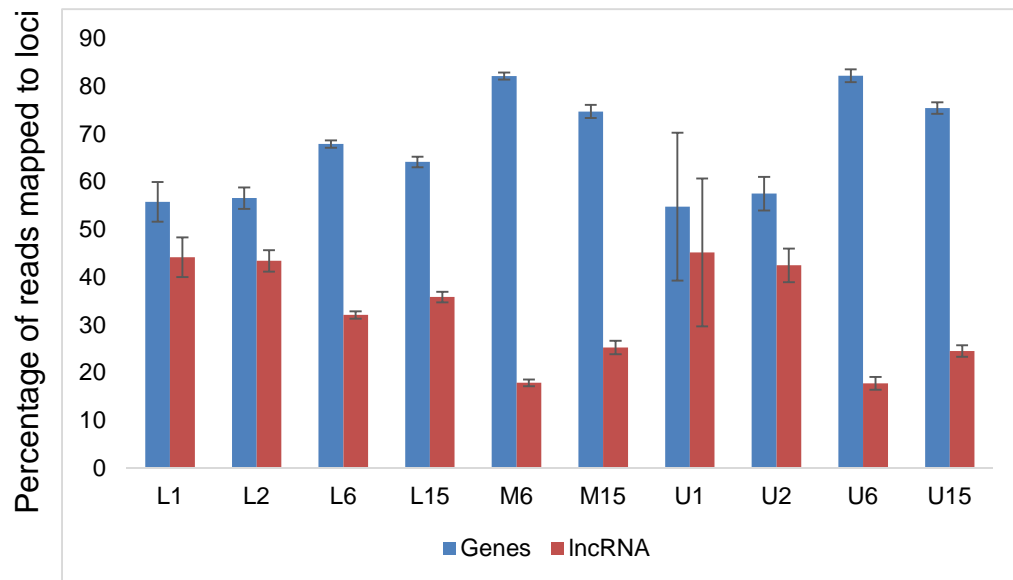

**Figure S1**

**Read mapping.** For each sample, the percentages of reads, mapping to different genomic features (A) and the percentages of locus-mapped reads, mapping to genes and to lncRNA (B), were calculated and plotted as bar charts.

Table S1: List of the primers

|                  |                      |
|------------------|----------------------|
| RDN25-1-int-for  | GAGGAAAAGAAACCAACCG  |
| RDN25-1-int2-rev | AGGCACTTTACAAAGAACCG |
| RPB2-int-for     | GAAGACGATGAATCACTAGG |
| RPB2-int-rev     | TCAGCATCAATGTATTCCAC |
| COG1-int-for     | AGTTACTTCCACTACTCCG  |
| COG1-int-rev     | TGTCTTCATAGAGTCCACC  |
| TAF6-int-for     | ATTAGAGGTGCTATTGTCAC |
| TAF6-int-rev     | CACTAAAGGTTTGACTTCAG |
| RAD52-int-for    | AGAACAACAACAATACCCG  |
| RAD52-int-rev    | TACTGTTAGCCTCAGCAG   |
| NCE102-int-for   | CATCGGTTTAATCAGTTCG  |
| NCE102-int2-rev  | CCAATGGTTCAATGAAGTTG |
| VBA5-int-for     | AGGAGATAGAAGGAGCATG  |
| VBA5-int-rev     | ACTGTAGCCTGTAACGAG   |
| YDL218w-int-for  | GAATGTACTTCTGTGCCG   |
| YDL218w-int-rev  | TACATGCTCTTCTATGACTG |
| MIG2-int-for     | GATACACCAACCAATACCG  |
| MIG2-int-rev     | ATTGGCATAGGAGAAGTTG  |
| CYC1-int-for     | ATGTCTACAATGCCACACC  |
| CYC1-int-rev     | CTTCAACCCACCAAAGGC   |
| CYC7-int-for     | GTGTCAGCAGTGCATAC    |
| CYC7-int-rev     | CTTCTTCAACCCGGCAAAC  |
| HSP30-int-for    | GGTGGACTGGTGTTC AAG  |
| HSP30-int-rev    | CACGATTTGAATTAACAGCG |
| CTS1-int-for     | ACTCAGCAGTCGTTGATG   |
| CTS1-int-rev     | TCCAACAAGTCACCAACAG  |
| THI5-int-for     | TACGGTATGAAGCCAGAAG  |
| THI5-int-rev     | AACGGTACAGAAGCAACAG  |
| VHT1-int-for     | CTGGACTTGGTTCACATTTG |
| VHT1-int-rev     | CAGAAAGTCCTGAAGTCACG |
| INO1-int-for     | CCCCTGTTCAAGACTACG   |
| INO1-int-rev     | TTAACGCCTTCCTTAGTTTG |
| ZRT1-int-for     | TGGTGGAACGAGTACAATG  |
| ZRT1-int-rev     | CAATCGCACCATAAGCAG   |
| ANS1-int-for     | AGTAAGCAACTCCTCAGAC  |
| ANS1-int-rev     | CAACCACCCACATCATATAC |
| CWP1-int-for     | CGGCTCGGATTTACAATAC  |
| CWP1-int-rev     | CATCCTCATTGACAACAGC  |
| STL1-int-for     | CTTGGTAGGAACACTAGACG |
| STL1-int-rev     | GTATATGGCAGCGTTACAAC |
| PDR15-int2-for   | ACTCACTCGGTTGTGTATG  |
| PDR15-int-rev    | CTGGTCTCCCAAGAACAAC  |
